# Supplementary material
Source: bioRxiv or medRxiv preprint supplement (https://www.medrxiv.org/highwire/filestream/69995/field_highwire_adjunct_files/3/19004721-4.pdf)
Supplement: Supplementary file [file 19004721-4.pdf]

## Supplementary video captions

Video S1: The participant performs a 2D cursor center-out task on the portable IBCI.

Video S2: The participant painted a fast-food order on the portable iBCI. Three continuous degrees-of-freedom were mapped to mouse velocity and click state. Three short clips are shown. In the first, he draws the outline of the taco shell and begins filling it in. In the second clip, he draws taco sauce on top of the completed shell. In the third clip, he fills in an outline of a beverage next to the completed taco.

Video S3: The participant used the portable iBCI at his home to play a classic arcade game. Three continuously decoded degrees-of-freedom were thresholded and mapped to five unique keypresses. In this clip he successfully completed level one of the game.
